# Supplementary material for: Inter-professional agreement and collaboration between extended scope physiotherapists and orthopaedic surgeons in an orthopaedic outpatient shoulder clinic – a mixed methods study
Source: PubMed Central journal article supplement (PMC7784386; doi:10.1186/s12891-020-03831-z), 2021-01-04
Supplement: 12891_2020_3831_MOESM1_ESM.pdf [file 12891_2020_3831_MOESM1_ESM.pdf]

## Additional file 1, Registration charts

### Registration of diagnoses and treatment

*Do not discuss the case with other health professionals during the examination and do not communicate your results to the patient.*

Participant number : \_\_\_\_\_ Name: \_\_\_\_\_

Date: \_\_\_\_\_ Name of examiner: \_\_\_\_\_

| <b>Diagnosis</b><br>Select one primary diagnosis only.<br>If relevant, one or more secondary diagnoses may be selected.                                     | Mark one --<br>and one only | Mark one or more,<br>if relevant |
|-------------------------------------------------------------------------------------------------------------------------------------------------------------|-----------------------------|----------------------------------|
|                                                                                                                                                             | Primary<br>diagnosis        | Secondary<br>diagnosis           |
| <b>Subacromial impingement</b> (including biceps tendinitis)<br>ICD-10 codes: DM 75.4, DM 75.3, DM 75.3A, DM 75.1, DM 75.2                                  |                             |                                  |
| <b>Rotator cuff injury</b> (including biceps longum rupture)<br>ICD-10 codes: DS 46.0, DS 46.1B, DM 75.1C                                                   |                             |                                  |
| <b>Glenohumeral instability</b><br>ICD-10 codes : DM 24.4, DM 24.4D, DS 46.1C, DS 43.0, DM 25.3, DM 35.7                                                    |                             |                                  |
| <b>Glenohumeral osteoarthritis</b><br>ICD-10 codes : DM 19.8A, DM 19.0*                                                                                     |                             |                                  |
| <b>Adhesive capsulitis</b><br>ICD-10 codes : DM 75.0                                                                                                        |                             |                                  |
| <b>Scapula instability</b><br>ICD-10 codes : DM 75.8, DM 75.9                                                                                               |                             |                                  |
| <b>Fracture sequelae</b><br>ICD-10 codes : DT 92.1                                                                                                          |                             |                                  |
| <b>Acromioclavicular joint disorder</b> (including sternoclavicular joint disorder)<br>ICD-10 codes : DM 19.8, DM 19.0*, DS 43.1, DS 43.2, DS 43.5, DS 43.6 |                             |                                  |
| <b>Non-related shoulder diagnosis</b><br>ICD-10 codes : among others, DM 54.2                                                                               |                             |                                  |

\*DM19.0 can both be used when osteoarthritis is present at the glenohumeral joint as well as the acromioclavicular joint.  
Please be aware to mark the appropriate box.

| <b>Treatment plan</b><br>Mark one or more                                                                                                                                                                                                                                                                                                                                                                                                                           |
|---------------------------------------------------------------------------------------------------------------------------------------------------------------------------------------------------------------------------------------------------------------------------------------------------------------------------------------------------------------------------------------------------------------------------------------------------------------------|
| <b>Referral to physiotherapy</b><br>Type: Municipality: <input type="checkbox"/> Further ESP assessment: <input type="checkbox"/> Hospital: <input type="checkbox"/> Private clinic: <input type="checkbox"/>                                                                                                                                                                                                                                                       |
| <b>Steroid injection</b><br>Diagnostic purpose: <input type="checkbox"/> Treatment: <input type="checkbox"/>                                                                                                                                                                                                                                                                                                                                                        |
| <b>Diagnostic imaging</b> (including referral to other paraclinical assessments or other specialists)<br>Referral to diagnostic imaging or other paraclinical assessments:<br>X-ray: <input type="checkbox"/> CT-scan: <input type="checkbox"/> MRI: <input type="checkbox"/> MR arthrogram: <input type="checkbox"/> ENG/EMG: <input type="checkbox"/> Other: <input type="checkbox"/><br>Referral to another specialist: <input type="checkbox"/> Describe: _____ |
| <b>Surgery</b> <input type="checkbox"/>                                                                                                                                                                                                                                                                                                                                                                                                                             |
| <b>No intervention</b> (none of the above)<br>Patient is provided with: Recommendations (including use of pain medication): <input type="checkbox"/><br>Recommendation to consult general practitioner: <input type="checkbox"/> No recommendations: <input type="checkbox"/>                                                                                                                                                                                       |

| <b>Follow up and inter-professional consultation</b>                                                                                  |
|---------------------------------------------------------------------------------------------------------------------------------------|
| <b>Follow up</b> Yes: <input type="checkbox"/> No: <input type="checkbox"/> If yes, which professional should do the follow up. _____ |
| <b>Need for inter-professional consultation<sup>1</sup>:</b> Yes: <input type="checkbox"/> No: <input type="checkbox"/>               |

<sup>1</sup> Mark this if you during normal conditions would have consulted the other profession before deciding diagnosis and treatment plan.

## Additional file 1, Registration charts

### Registration form – common decision

After the two independent examinations, ESP and OS discuss their results and make a common decision on diagnosis(es) and treatment plan. The health professional, who did the first examination of the patient, is responsible of filling in this registration form, of passing on the information to the patient and of writing the medical record of the patient. The decision on actual initiated treatment is a common decision between examiner and patient, and potential deviations from the "common decision" should NOT be reported in the form beneath.

Participant number : \_\_\_\_\_ Name: \_\_\_\_\_

Date: \_\_\_\_\_ Name of professional filling in this form \_\_\_\_\_

#### Demographics

**Gender** Female:  Male:  **Age:** \_\_\_\_\_ years

#### Employment status

Employed:  Unemployed:  Pensioner/retired:  Sick leave:  Other: \_\_\_\_\_

#### Diagnosis

Select one primary diagnosis only.  
If relevant, one or more secondary diagnoses may be selected.

|                                                                                                                                                            | Mark one -- and one only | Mark one or more, if relevant |
|------------------------------------------------------------------------------------------------------------------------------------------------------------|--------------------------|-------------------------------|
|                                                                                                                                                            | Primary diagnosis        | Secondary diagnosis           |
| <b>Subacromial impingement</b> (including biceps tendinitis)<br>ICD-10 codes: DM 75.4, DM 75.3, DM 75.3A, DM 75.1, DM 75.2                                 |                          |                               |
| <b>Rotator cuff injury</b> (including biceps longum rupture)<br>ICD-10 codes: DS 46.0, DS 46.1B, DM 75.1C                                                  |                          |                               |
| <b>Glenohumeral instability</b><br>ICD-10 codes : DM 24.4, DM 24.4D, DS 46.1C, DS 43.0, DM 25.3, DM 35.7                                                   |                          |                               |
| <b>Glenohumeral osteoarthritis</b><br>ICD-10 codes : DM 19.8A, DM 19.0                                                                                     |                          |                               |
| <b>Adhesive capsulitis</b><br>ICD-10 codes : DM 75.0                                                                                                       |                          |                               |
| <b>Scapula instability</b><br>ICD-10 codes : DM 75.8, DM 75.9                                                                                              |                          |                               |
| <b>Fracture sequelae</b><br>ICD-10 codes : DT 92.1                                                                                                         |                          |                               |
| <b>Acromioclavicular joint disorder</b> (including sternoclavicular joint disorder)<br>ICD-10 codes : DM 19.8, DM 19.0, DS 43.1, DS 43.2, DS 43.5, DS 43.6 |                          |                               |
| <b>Non-related shoulder diagnosis</b><br>ICD-10 codes : among others, DM 54.2                                                                              |                          |                               |

#### Treatment plan

Mark one or more

#### Referral to physiotherapy

**Type:** Municipality:  Further ESP assessment:  Hospital:  Private clinic:

#### Steroid injection

Diagnostic purpose:  Treatment:

#### Diagnostic imaging

 (including referral to other paraclinical assessments or other specialists)

Referral to diagnostic imaging or other paraclinical assessments:

X-ray:  CT-scan:  MRI:  MR arthrogram:  ENG/EMG:  Other:

Referral to another specialist:  Describe: \_\_\_\_\_

#### Surgery

#### No intervention

 (none of the above)

Patient is provided with: \_\_\_\_\_ Recommendations (including use of pain medication):

Recommendation to consult general practitioner:  No recommendations:

#### Follow up

**Follow up** Yes:  No:  If yes, which professional should do the follow up. \_\_\_\_\_
